# Supplementary material for: Bilirubin and its crystal forms
Source: Royal Society of Chemistry journal article supplement (doi:10.1039/d4ce00123k), 2024-01-01
Supplement: d4ce00123k1.pdf [file d4ce00123k1.pdf]

Supplementary information for:

## Bilirubin and its Crystal Forms

Matthew L. Bracken, Manuel A. Fernandes\* and Sadhna Mathura\*

*Molecular Sciences Institute, School of Chemistry, University of the Witwatersrand, PO Wits 2050, Johannesburg, South Africa. Tel: +27-11-7176727; Fax: +27-11-7176749; E-mail:*

*[Manuel.Fernandes@wits.ac.za](mailto:Manuel.Fernandes@wits.ac.za) and [Sadhna.Mathura@wits.ac.za](mailto:Sadhna.Mathura@wits.ac.za)*

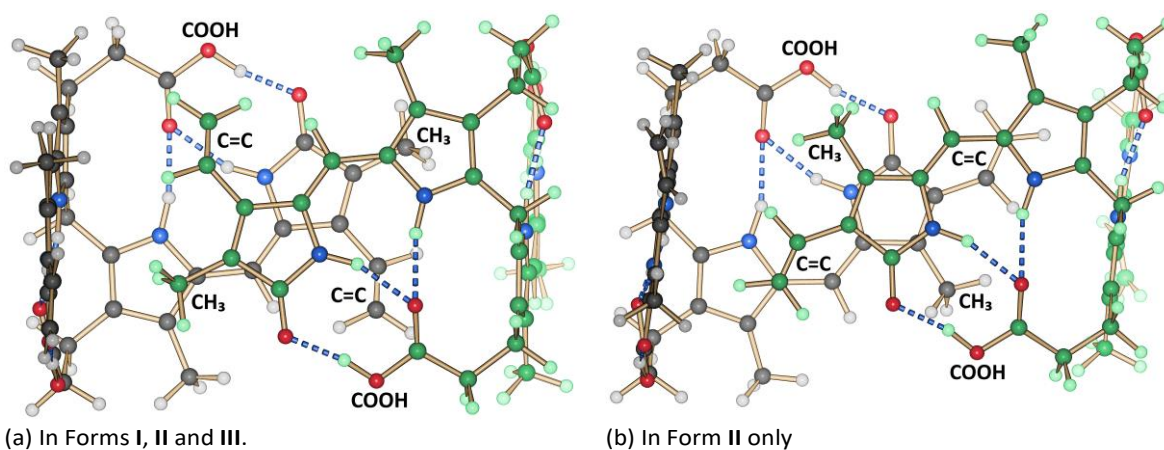

Fig. S1. The two orientations in the most stable molecule...molecule interaction (region 1 in Figure 7) in the three forms of bilirubin. The orientation shown in (a) is common to all three forms, with the distance between centres of mass of the interacting molecules ranging from around 7.60 to 7.94 Å, and the interaction energy ranging from -86 to -102 kJ/mol. In this orientation, the vinyl groups (C=C) of both molecules overlap the carboxylic acid (COOH) of the neighbouring molecule. The orientation shown in (b) is only found in Form II, where the methyl groups of both molecules overlap the carboxylic acid (COOH) of the neighbouring molecule. The distance between centres of mass of the interacting molecules ranges from around 8.3 to 8.4 Å, and the interaction energy ranges from -69 to -79 kJ/mol. Both orientations are between molecules that are related by a crystallographic centre of symmetry.

Table S1. The most significant molecule...molecule energies, which are more stable than 20 kJ/mol, calculated with CLP-PIXEL are presented for Form I, II, and III. Additionally, the symmetry between the interacting molecules and the breakdown of the energies contributing to the interaction are listed. For detailed explanations of these numbers, see references A. Gavezzotti, *J. Phys. Chem. B.*, 2003, **107**, 2344– 2353 and J. Bernstein, J. D. Dunitz and A. Gavezzotti, *Crystal Growth & Design*, 2008, **8**, 2011–2018.

| Symmetry<br>(molecule pair)                                                                                                             | PIXEL (Total)<br>(kJ/mol) | PIXEL<br>(Coulombic) | PIXEL<br>(Polarization) | PIXEL<br>(Dispersion) | PIXEL<br>(Repulsion) | Distance<br>(Å) |
|-----------------------------------------------------------------------------------------------------------------------------------------|---------------------------|----------------------|-------------------------|-----------------------|----------------------|-----------------|
| Form I                                                                                                                                  |                           |                      |                         |                       |                      |                 |
| -x, 1-y, 2-z                                                                                                                            | -102.6                    | -31.1                | -12.7                   | -144.3                | 85.5                 | 7.8             |
| 1-x, 1-y, 1-z                                                                                                                           | -100.4                    | -36.2                | -17.9                   | -153                  | 106.7                | 7.6             |
| +x, -1+y, +z                                                                                                                            | -69.0                     | -21.5                | -10                     | -101.1                | 63.6                 | 9.2             |
| +x, 1+y, +z                                                                                                                             | -69.0                     | -21.5                | -10                     | -101.1                | 63.6                 | 9.2             |
| +x, +y, +z                                                                                                                              | -65.7                     | -23                  | -9.8                    | -88.3                 | 55.4                 | 8.1             |
| 1-x, -y, 1-z                                                                                                                            | -29.1                     | -7.9                 | -2.8                    | -39.2                 | 20.8                 | 11.6            |
| -x, 2-y, 2-z                                                                                                                            | -28.3                     | -9.4                 | -3.5                    | -35                   | 19.5                 | 11.3            |
| -x, 1-y, 1-z                                                                                                                            | -25.9                     | -11.8                | -4.9                    | -23.2                 | 14.1                 | 11.1            |
| Form II (orientation 1a; see Figure 7 and S1a)                                                                                          |                           |                      |                         |                       |                      |                 |
| 1-x, 1-y, -z                                                                                                                            | -102.1                    | -32.7                | -13.1                   | -149.8                | 93.4                 | 7.8             |
| 1-x, 1-y, 1-z                                                                                                                           | -79.4                     | -10                  | -7.1                    | -109.6                | 47.2                 | 8.3             |
| +x, 1+y, +z                                                                                                                             | -68.6                     | -24.6                | -12.6                   | -113.3                | 81.9                 | 8.9             |
| +x, -1+y, +z                                                                                                                            | -68.6                     | -24.6                | -12.6                   | -113.3                | 81.9                 | 8.9             |
| +x, +y, +z                                                                                                                              | -62.9                     | -24.2                | -11.3                   | -95.1                 | 67.7                 | 8.0             |
| 2-x, 1-y, 1-z                                                                                                                           | -41.8                     | -22.4                | -11.1                   | -54.1                 | 45.7                 | 9.3             |
| 1-x, -y, 1-z                                                                                                                            | -29.2                     | -5.1                 | -1.8                    | -37.8                 | 15.6                 | 11.1            |
| 1-x, 2-y, -z                                                                                                                            | -28.3                     | -13.4                | -6.4                    | -38.2                 | 29.7                 | 11.1            |
| -x, 1-y, -z                                                                                                                             | -23.9                     | -9.6                 | -3.9                    | -21.7                 | 11.3                 | 11.1            |
| Form II (orientation 1b; see Figure 7 and S1b)                                                                                          |                           |                      |                         |                       |                      |                 |
| 1-x, 1-y, -z                                                                                                                            | -98.4                     | -32.6                | -12.9                   | -146.1                | 93.3                 | 7.8             |
| +x, 1+y, +z                                                                                                                             | -69.8                     | -22.6                | -10.5                   | -107.5                | 70.8                 | 8.9             |
| +x, -1+y, +z                                                                                                                            | -69.8                     | -22.6                | -10.5                   | -107.5                | 70.8                 | 8.9             |
| 1-x, 1-y, 1-z                                                                                                                           | -69.2                     | -23.3                | -11                     | -127                  | 92                   | 8.4             |
| +x, +y, +z                                                                                                                              | -62.2                     | -24.3                | -11.3                   | -94.4                 | 67.8                 | 8.1             |
| 2-x, 1-y, 1-z                                                                                                                           | -50.1                     | -30.8                | -12.4                   | -57.6                 | 50.8                 | 9.0             |
| 1-x, 2-y, -z                                                                                                                            | -28.8                     | -13.1                | -6.2                    | -38.4                 | 28.9                 | 11.1            |
| 1-x, -y, 1-z                                                                                                                            | -27.2                     | -15.7                | -8.1                    | -41.4                 | 38                   | 11.1            |
| -x, 1-y, -z                                                                                                                             | -23.9                     | -9.6                 | -4                      | -21.7                 | 11.3                 | 11.1            |
| Form III<br>(G. Le Bas, A. Allegret, Y. Mauguen, C. De Rango and M. Bailly, <i>Acta Crystallogr. B.</i> , 1980, <b>36</b> , 3007–3011.) |                           |                      |                         |                       |                      |                 |
| 2-x, 1-y, 1-z                                                                                                                           | -86.6                     | -28.9                | -15                     | -139.5                | 96.7                 | 7.9             |
| 1-x, 1-y, -z                                                                                                                            | -74.3                     | -24.5                | -12.9                   | -107.4                | 70.6                 | 9.3             |
| 1-x, 1-y, 1-z                                                                                                                           | -60.9                     | -13.6                | -11.5                   | -86.1                 | 50.2                 | 8.0             |
| 2-x, 1-y, -z                                                                                                                            | -28.0                     | -9.5                 | -3.7                    | -34.1                 | 19.4                 | 11.7            |
| +x, -1+y, +z                                                                                                                            | -14.3                     | -1.8                 | -2                      | -16.2                 | 5.7                  | 12.0            |
| +x, 1+y, +z                                                                                                                             | -14.3                     | -1.8                 | -2                      | -16.2                 | 5.7                  | 12.0            |
