# Supplementary material for: Bilirubin and its crystal forms
Source: Royal Society of Chemistry journal article supplement (doi:10.1039/d4ce00123k), 2024-01-01
Supplement: d4ce00123k2.zip [file d4ce00123k2.zip]

## checkCIF/PLATON report

Structure factors have been supplied for datablock(s) Form2\_23mbb\_sadnah16\_ns16\_bilpyether

THIS REPORT IS FOR GUIDANCE ONLY. IF USED AS PART OF A REVIEW PROCEDURE FOR PUBLICATION, IT SHOULD NOT REPLACE THE EXPERTISE OF AN EXPERIENCED CRYSTALLOGRAPHIC REFEREE.

No syntax errors found.      CIF dictionary      Interpreting this report

### Datablock: Form2\_23mbb\_sadnah16\_ns16\_bilpyether

---

Bond precision:      C-C = 0.0100 Å      Wavelength=0.71073

Cell:                      a=11.8077(10)              b=15.0220(12)              c=19.3471(17)  
                            alpha=98.973(3)              beta=104.421(3)              gamma=111.029(3)  
Temperature:              173 K

|                        | Calculated                | Reported                 |
|------------------------|---------------------------|--------------------------|
| Volume                 | 2985.8(4)                 | 2985.8(4)                |
| Space group            | P -1                      | P -1                     |
| Hall group             | -P 1                      | -P 1                     |
| Moiety formula         | C33 H36 N4 O6 [+ solvent] | 1(C33 H36 N4 O6), 0.25[] |
| Sum formula            | C33 H36 N4 O6 [+ solvent] | C33 H36 N4 O6            |
| Mr                     | 584.66                    | 584.66                   |
| Dx, g cm <sup>-3</sup> | 1.301                     | 1.301                    |
| Z                      | 4                         | 4                        |
| Mu (mm <sup>-1</sup> ) | 0.090                     | 0.090                    |
| F000                   | 1240.0                    | 1240.0                   |
| F000'                  | 1240.57                   |                          |
| h, k, lmax             | 14, 17, 22                | 14, 17, 22               |
| Nref                   | 10509                     | 10506                    |
| Tmin, Tmax             | 0.987, 0.995              | 0.617, 0.746             |
| Tmin'                  | 0.987                     |                          |

Correction method= # Reported T Limits: Tmin=0.617 Tmax=0.746  
AbsCorr = MULTI-SCAN

Data completeness= 1.000                      Theta(max)= 24.998

|                               |                   |
|-------------------------------|-------------------|
| R(reflections)= 0.0948( 4945) | wR2(reflections)= |
| S = 1.029                     | 0.2974( 10506)    |
| Npar= 808                     |                   |

---

The following ALERTS were generated. Each ALERT has the format  
**test-name\_ALERT\_alert-type\_alert-level.**  
Click on the hyperlinks for more details of the test.

---

 **Alert level B**

RINTA01\_ALERT\_3\_B The value of Rint is greater than 0.18  
Rint given 0.220

**Author Response: The crystals are small and don't diffract well. Of several data collection attempts, this was the best data set we got.**

PLAT020\_ALERT\_3\_B The Value of Rint is Greater Than 0.12 ..... 0.220 Report

**Author Response: The crystals are small and don't diffract well. Of several data collection attempts, this was the data set we got.**

PLAT416\_ALERT\_2\_B Short Intra D-H..H-D H5 ..H6 . 1.85 Ang.  
x,y,z = 1\_555 Check

**Author Response: Within the bilirubin molecule, there is three-center hydrogen bonding involving the amine (N-H) functional groups from two pyrroles and a carboxylic oxygen. The two amine functional groups are positioned closely together, creating the close contact.**

PLAT416\_ALERT\_2\_B Short Intra D-H..H-D H7 ..H8 . 1.84 Ang.  
x,y,z = 1\_555 Check

**Author Response: Within the bilirubin molecule, there is three-center hydrogen bonding involving the amine (N-H) functional groups from two pyrroles and a carboxylic oxygen. The two amine functional groups are positioned closely together, creating the close contact.**

PLAT416\_ALERT\_2\_B Short Intra D-H..H-D H1 ..H2 . 1.84 Ang.  
x,y,z = 1\_555 Check

**Author Response: Within the bilirubin molecule, there is three-center hydrogen bonding involving the amine (N-H) functional groups from two pyrroles and a carboxylic oxygen. The two amine functional groups are positioned closely together, creating the close contact.**

PLAT416\_ALERT\_2\_B Short Intra D-H..H-D H3A ..H4 . 1.86 Ang.  
x,y,z = 1\_555 Check

**Author Response: Within the bilirubin molecule, there is three-center hydrogen bonding involving the amine (N-H) functional groups from two pyrroles and a carboxylic oxygen. The two amine functional groups are positioned closely together, creating the close contact.**



#### Alert level C

|                   |                                                  |         |        |
|-------------------|--------------------------------------------------|---------|--------|
| PLAT026_ALERT_3_C | Ratio Observed / Unique Reflections (too) Low .. | 47%     | Check  |
| PLAT084_ALERT_3_C | High wR2 Value (i.e. > 0.25) .....               | 0.30    | Report |
| PLAT230_ALERT_2_C | Hirshfeld Test Diff for N1 --C5 .                | 7.0     | s.u.   |
| PLAT230_ALERT_2_C | Hirshfeld Test Diff for C26 --C27 .              | 6.1     | s.u.   |
| PLAT234_ALERT_4_C | Large Hirshfeld Difference C21 --C26 .           | 0.17    | Ang.   |
| PLAT241_ALERT_2_C | High 'MainMol' Ueq as Compared to Neighbors of   | C40     | Check  |
| PLAT329_ALERT_4_C | Carbon Atom Hybridisation Unclear for .....      | C40     | Check  |
| PLAT340_ALERT_3_C | Low Bond Precision on C-C Bonds .....            | 0.00995 | Ang.   |
| PLAT368_ALERT_2_C | Short C(sp2)-C(sp2) Bond C31 - C32 .             | 1.15    | Ang.   |
| PLAT410_ALERT_2_C | Short Intra H...H Contact H31 ..H32B .           | 1.99    | Ang.   |
|                   | x,y,z =                                          | 1_555   | Check  |
| PLAT413_ALERT_2_C | Short Inter XH3 .. XHn H46C ..H46C .             | 2.13    | Ang.   |
|                   | 2-x,1-y,1-z =                                    | 2_766   | Check  |
| PLAT905_ALERT_3_C | Negative K value in the Analysis of Variance ... | -13.489 | Report |
| PLAT905_ALERT_3_C | Negative K value in the Analysis of Variance ... | -0.328  | Report |
| PLAT977_ALERT_2_C | Check Negative Difference Density on H48B .      | -0.42   | eA-3   |



#### Alert level G

|                   |                                                  |        |              |
|-------------------|--------------------------------------------------|--------|--------------|
| PLAT002_ALERT_2_G | Number of Distance or Angle Restraints on AtSite | 8      | Note         |
| PLAT003_ALERT_2_G | Number of Uiso or Uij Restrained non-H Atoms ... | 20     | Report       |
| PLAT007_ALERT_5_G | Number of Unrefined Donor-H Atoms .....          | 12     | Report       |
|                   | H5 H6 H7 H8 H9 H12 H1 H2 H3 H3A H4               |        |              |
|                   | H6A                                              |        |              |
| PLAT042_ALERT_1_G | Calc. and Reported MoietyFormula Strings Differ  |        | Please Check |
|                   | Calc: C33 H36 N4 O6                              |        |              |
|                   | Rep.: 1(C33 H36 N4 O6), 0.25[]                   |        |              |
| PLAT072_ALERT_2_G | SHELXL First Parameter in WGHT Unusually Large   | 0.12   | Report       |
| PLAT154_ALERT_1_G | The s.u.'s on the Cell Angles are Equal ..(Note) | 0.003  | Degree       |
| PLAT176_ALERT_4_G | The CIF-Embedded .res File Contains SADI Records | 1      | Report       |
| PLAT178_ALERT_4_G | The CIF-Embedded .res File Contains SIMU Records | 5      | Report       |
| PLAT187_ALERT_4_G | The CIF-Embedded .res File Contains RIGU Records | 5      | Report       |
| PLAT191_ALERT_3_G | A Non-default SADI Restraint Value has been used | 0.0050 | Report       |
| PLAT301_ALERT_3_G | Main Residue Disorder .....(Resd 1)              | 5%     | Note         |
| PLAT410_ALERT_2_G | Short Intra H...H Contact H59 ..H66C .           | 2.09   | Ang.         |
|                   | x,y,z =                                          | 1_555  | Check        |
| PLAT432_ALERT_2_G | Short Inter X...Y Contact O5 ..C57 .             | 2.97   | Ang.         |
|                   | x,y,z =                                          | 1_555  | Check        |
| PLAT605_ALERT_4_G | Largest Solvent Accessible VOID in the Structure | 123    | A**3         |
| PLAT860_ALERT_3_G | Number of Least-Squares Restraints .....         | 213    | Note         |
| PLAT868_ALERT_4_G | ALERTS Due to the Use of _smtbx_masks Suppressed | !      | Info         |
| PLAT910_ALERT_3_G | Missing # of FCF Reflection(s) Below Theta(Min). | 2      | Note         |
|                   | 0 1 0, 0 0 1,                                    |        |              |
| PLAT930_ALERT_2_G | FCF-based Twin Law [-1 3-5] Est.d BASF           | 0.78   | Check        |
| PLAT933_ALERT_2_G | Number of HKL-OMIT Records in Embedded .res File | 1      | Note         |
|                   | 0 1 0,                                           |        |              |
| PLAT967_ALERT_5_G | Note: Two-Theta Cutoff Value in Embedded .res .. | 50.0   | Degree       |

PLAT969\_ALERT\_5\_G The 'Henn et al.' R-Factor-gap value ..... 3.42 Note  
                   Predicted wR2: Based on SigI\*\*2 8.69 or SHELX Weight 30.09  
 PLAT978\_ALERT\_2\_G Number C-C Bonds with Positive Residual Density. 0 Info  
 PLAT992\_ALERT\_5\_G Repd & Actual \_reflns\_number\_gt Values Differ by 3 Check

---

0 **ALERT level A** = Most likely a serious problem - resolve or explain  
 6 **ALERT level B** = A potentially serious problem, consider carefully  
 14 **ALERT level C** = Check. Ensure it is not caused by an omission or oversight  
 23 **ALERT level G** = General information/check it is not something unexpected

2 ALERT type 1 CIF construction/syntax error, inconsistent or missing data  
 19 ALERT type 2 Indicator that the structure model may be wrong or deficient  
 11 ALERT type 3 Indicator that the structure quality may be low  
 7 ALERT type 4 Improvement, methodology, query or suggestion  
 4 ALERT type 5 Informative message, check

---

It is advisable to attempt to resolve as many as possible of the alerts in all categories. Often the minor alerts point to easily fixed oversights, errors and omissions in your CIF or refinement strategy, so attention to these fine details can be worthwhile. In order to resolve some of the more serious problems it may be necessary to carry out additional measurements or structure refinements. However, the purpose of your study may justify the reported deviations and the more serious of these should normally be commented upon in the discussion or experimental section of a paper or in the "special\_details" fields of the CIF. checkCIF was carefully designed to identify outliers and unusual parameters, but every test has its limitations and alerts that are not important in a particular case may appear. Conversely, the absence of alerts does not guarantee there are no aspects of the results needing attention. It is up to the individual to critically assess their own results and, if necessary, seek expert advice.

### Publication of your CIF in IUCr journals

A basic structural check has been run on your CIF. These basic checks will be run on all CIFs submitted for publication in IUCr journals (*Acta Crystallographica*, *Journal of Applied Crystallography*, *Journal of Synchrotron Radiation*); however, if you intend to submit to *Acta Crystallographica Section C* or *E* or *IUCrData*, you should make sure that full publication checks are run on the final version of your CIF prior to submission.

### Publication of your CIF in other journals

Please refer to the *Notes for Authors* of the relevant journal for any special instructions relating to CIF submission.

---

**PLATON version of 06/01/2024; check.def file version of 05/01/2024**
