# Supplementary material for: Bilirubin and its crystal forms
Source: Royal Society of Chemistry journal article supplement (doi:10.1039/d4ce00123k), 2024-01-01
Supplement: d4ce00123k2.zip [file d4ce00123k2.zip]

## checkCIF/PLATON report

Structure factors have been supplied for datablock(s) Form\_1\_23mbb\_sadhna18\_ns18\_bilpyether

THIS REPORT IS FOR GUIDANCE ONLY. IF USED AS PART OF A REVIEW PROCEDURE FOR PUBLICATION, IT SHOULD NOT REPLACE THE EXPERTISE OF AN EXPERIENCED CRYSTALLOGRAPHIC REFEREE.

No syntax errors found.      CIF dictionary      Interpreting this report

### Datablock: Form\_1\_23mbb\_sadhna18\_ns18\_bilpyether

---

Bond precision:      = 0.0000 A

Wavelength=0.71073

Cell:                      a=11.6630 (7)                      b=15.3457 (8)                      c=17.2204 (10)  
                              alpha=73.515 (2)                      beta=81.274 (3)                      gamma=82.823 (3)  
Temperature:              173 K

|                        | Calculated    | Reported      |
|------------------------|---------------|---------------|
| Volume                 | 2910.2 (3)    | 2910.2 (3)    |
| Space group            | P -1          | P -1          |
| Hall group             | -P 1          | -P 1          |
| Moiety formula         | C33 H36 N4 O6 | C33 H36 N4 O6 |
| Sum formula            | C33 H36 N4 O6 | C33 H36 N4 O6 |
| Mr                     | 584.66        | 584.66        |
| Dx, g cm <sup>-3</sup> | 1.334         | 1.334         |
| Z                      | 4             | 4             |
| Mu (mm <sup>-1</sup> ) | 0.093         | 0.093         |
| F000                   | 1240.0        | 1240.0        |
| F000'                  | 1240.57       |               |
| h, k, lmax             | 13, 18, 20    | 13, 18, 20    |
| Nref                   | 10256         | 10254         |
| Tmin, Tmax             | 0.983, 0.986  | 0.630, 0.745  |
| Tmin'                  | 0.979         |               |

Correction method= # Reported T Limits: Tmin=0.630 Tmax=0.745  
AbsCorr = MULTI-SCAN

Data completeness= 1.000

Theta(max)= 24.999

R(reflections)= 0.0851 ( 6779)

wR2(reflections)=  
0.2681 ( 10254)

S = 1.084

Npar= 1519

---

The following ALERTS were generated. Each ALERT has the format

**test-name\_ALERT\_alert-type\_alert-level.**

Click on the hyperlinks for more details of the test.

---

 **Alert level B**

PLAT088\_ALERT\_3\_B Poor Data / Parameter Ratio ..... 6.75 Note

**Author Response: In the asymmetric unit, there are two fully disordered molecules, which means there are a lot of parameters to solve. Additionally, the crystal didn't diffract strongly, resulting in a lack of data.**

---

 **Alert level C**

|                   |                                                 |       |        |
|-------------------|-------------------------------------------------|-------|--------|
| PLAT084_ALERT_3_C | High wR2 Value (i.e. > 0.25) .....              | 0.27  | Report |
| PLAT213_ALERT_2_C | Atom C32A has ADP max/min Ratio .....           | 3.1   | prolat |
| PLAT213_ALERT_2_C | Atom C62A has ADP max/min Ratio .....           | 3.9   | oblate |
| PLAT220_ALERT_2_C | NonSolvent Resd 1 C Ueq(max)/Ueq(min) Range     | 3.5   | Ratio  |
| PLAT223_ALERT_4_C | Solv./Anion Resd 2 H Ueq(max)/Ueq(min) Range    | 4.5   | Ratio  |
| PLAT234_ALERT_4_C | Large Hirshfeld Difference C1 --C2 .            | 0.18  | Ang.   |
| PLAT234_ALERT_4_C | Large Hirshfeld Difference O11 --C49 .          | 0.19  | Ang.   |
| PLAT234_ALERT_4_C | Large Hirshfeld Difference C61 --C62 .          | 0.19  | Ang.   |
| PLAT250_ALERT_2_C | Large U3/U1 Ratio for <U(i,j)> Tensor(Resd 2)   | 2.3   | Note   |
| PLAT250_ALERT_2_C | Large U3/U1 Ratio for <U(i,j)> Tensor(Resd 3)   | 2.1   | Note   |
| PLAT260_ALERT_2_C | Large Average Ueq of Residue Including 07       | 0.102 | Check  |
| PLAT260_ALERT_2_C | Large Average Ueq of Residue Including 01A      | 0.114 | Check  |
| PLAT906_ALERT_3_C | Large K Value in the Analysis of Variance ..... | 2.022 | Check  |

---

 **Alert level G**

|                   |                                                   |        |        |
|-------------------|---------------------------------------------------|--------|--------|
| PLAT002_ALERT_2_G | Number of Distance or Angle Restraints on AtSite  | 86     | Note   |
| PLAT003_ALERT_2_G | Number of Uiso or Uij Restrained non-H Atoms ...  | 86     | Report |
| PLAT007_ALERT_5_G | Number of Unrefined Donor-H Atoms .....           | 24     | Report |
|                   | H1 H2 H3 H3A H4 H6 H5 H6B H7 H8B H9               |        |        |
|                   | H12 H3AA H2AA H3AB H4A H6A H1AC H5A H9A H6AA H7AD |        |        |
| PLAT072_ALERT_2_G | SHELXL First Parameter in WGHT Unusually Large    | 0.10   | Report |
| PLAT172_ALERT_4_G | The CIF-Embedded .res File Contains DFIX Records  | 2      | Report |
| PLAT175_ALERT_4_G | The CIF-Embedded .res File Contains SAME Records  | 2      | Report |
| PLAT178_ALERT_4_G | The CIF-Embedded .res File Contains SIMU Records  | 2      | Report |
| PLAT186_ALERT_4_G | The CIF-Embedded .res File Contains ISOR Records  | 1      | Report |
| PLAT187_ALERT_4_G | The CIF-Embedded .res File Contains RIGU Records  | 2      | Report |
| PLAT188_ALERT_3_G | A Non-default SIMU Restraint Value has been used  | 0.0200 | Report |
| PLAT188_ALERT_3_G | A Non-default SIMU Restraint Value has been used  | 0.0200 | Report |
| PLAT189_ALERT_3_G | A Non-default SAME Restraint Value for First Par  | 0.0050 | Report |
| PLAT189_ALERT_3_G | A Non-default SAME Restraint Value for First Par  | 0.0050 | Report |
| PLAT190_ALERT_3_G | A Non-default RIGU Restraint Value for First Par  | 0.0020 | Report |
| PLAT190_ALERT_3_G | A Non-default RIGU Restraint Value for SecondPar  | 0.0020 | Report |
| PLAT190_ALERT_3_G | A Non-default RIGU Restraint Value for First Par  | 0.0020 | Report |
| PLAT190_ALERT_3_G | A Non-default RIGU Restraint Value for SecondPar  | 0.0020 | Report |
| PLAT230_ALERT_2_G | Hirshfeld Test Diff for C31 --C32 .               | 5.1    | s.u.   |
| PLAT230_ALERT_2_G | Hirshfeld Test Diff for C34 --C35 .               | 5.9    | s.u.   |
| PLAT230_ALERT_2_G | Hirshfeld Test Diff for C61 --C65 .               | 7.7    | s.u.   |
| PLAT301_ALERT_3_G | Main Residue Disorder ..... (Resd 1)              | 100%   | Note   |

|                   |                                                  |                      |                |       |        |
|-------------------|--------------------------------------------------|----------------------|----------------|-------|--------|
| PLAT301_ALERT_3_G | Main Residue Disorder                            | .....(Resd           | 3)             | 100%  | Note   |
| PLAT301_ALERT_3_G | Main Residue Disorder                            | .....(Resd           | 4)             | 100%  | Note   |
| PLAT302_ALERT_4_G | Anion/Solvent/Minor-Residue Disorder             | (Resd                | 2)             | 100%  | Note   |
| PLAT304_ALERT_4_G | Non-Integer Number of Atoms in                   | ..... (Resd          | 1)             | 63.75 | Check  |
| PLAT304_ALERT_4_G | Non-Integer Number of Atoms in                   | ..... (Resd          | 2)             | 65.41 | Check  |
| PLAT304_ALERT_4_G | Non-Integer Number of Atoms in                   | ..... (Resd          | 3)             | 15.25 | Check  |
| PLAT304_ALERT_4_G | Non-Integer Number of Atoms in                   | ..... (Resd          | 4)             | 13.59 | Check  |
| PLAT309_ALERT_2_G | Single Bonded Oxygen (C-O > 1.3 Ang)             | .....                |                | 04A   | Check  |
| PLAT309_ALERT_2_G | Single Bonded Oxygen (C-O > 1.3 Ang)             | .....                |                | 010A  | Check  |
| PLAT380_ALERT_4_G | Incorrectly? Oriented X(sp2)-Methyl Moiety       | .....                |                | C7    | Check  |
| PLAT380_ALERT_4_G | Incorrectly? Oriented X(sp2)-Methyl Moiety       | .....                |                | C13   | Check  |
| PLAT380_ALERT_4_G | Incorrectly? Oriented X(sp2)-Methyl Moiety       | .....                |                | C25   | Check  |
| PLAT380_ALERT_4_G | Incorrectly? Oriented X(sp2)-Methyl Moiety       | .....                |                | C33   | Check  |
| PLAT380_ALERT_4_G | Incorrectly? Oriented X(sp2)-Methyl Moiety       | .....                |                | C40   | Check  |
| PLAT380_ALERT_4_G | Incorrectly? Oriented X(sp2)-Methyl Moiety       | .....                |                | C46   | Check  |
| PLAT380_ALERT_4_G | Incorrectly? Oriented X(sp2)-Methyl Moiety       | .....                |                | C58   | Check  |
| PLAT380_ALERT_4_G | Incorrectly? Oriented X(sp2)-Methyl Moiety       | .....                |                | C66   | Check  |
| PLAT720_ALERT_4_G | Number of Unusual/Non-Standard Labels            | .....                |                | 13    | Note   |
|                   | H3AA H2AA H3AB H1AA H1AB H2AB H1AC H7AA          |                      |                |       |        |
|                   | H7AB H7AC H6AA H7AD H8AA                         |                      |                |       |        |
| PLAT721_ALERT_1_G | Bond Calc                                        | 0.85000, Rep         | 0.84000 Dev... | 0.01  | Ang.   |
|                   | O9A -H9A                                         | 1_555 1_555          | .....          | # 249 | Check  |
| PLAT722_ALERT_1_G | Angle Calc                                       | 106.00, Rep          | 107.10 Dev...  | 1.10  | Degree |
|                   | C61A -C64A -H64C                                 | 1_555 1_555 1_555    |                | # 549 | Check  |
| PLAT725_ALERT_2_G | D-H Calc                                         | 0.85000, Rep         | 0.84000 Dev... | 0.01  | Ang.   |
|                   | O9A -H9A                                         | 1_555 1_555          | .....          | # 19  | Check  |
| PLAT773_ALERT_2_G | Check long C-C Bond in CIF: C29A                 | --C33A               |                | 1.76  | Ang.   |
| PLAT773_ALERT_2_G | Check long C-C Bond in CIF: C62A                 | --C66A               |                | 1.76  | Ang.   |
| PLAT860_ALERT_3_G | Number of Least-Squares Restraints               | .....                |                | 1355  | Note   |
| PLAT909_ALERT_3_G | Percentage of I>2sig(I) Data at Theta(Max) Still |                      |                | 30%   | Note   |
| PLAT910_ALERT_3_G | Missing # of FCF Reflection(s) Below Theta(Min). |                      |                | 2     | Note   |
|                   | 0 1 0, 0 0 1,                                    |                      |                |       |        |
| PLAT933_ALERT_2_G | Number of HKL-OMIT Records in Embedded .res File |                      |                | 1     | Note   |
|                   | 0 1 0,                                           |                      |                |       |        |
| PLAT967_ALERT_5_G | Note: Two-Theta Cutoff Value in Embedded .res .. |                      |                | 50.0  | Degree |
| PLAT969_ALERT_5_G | The 'Henn et al.' R-Factor-gap value             | .....                |                | 3.72  | Note   |
|                   | Predicted wR2: Based on SigI**2                  | 7.21 or SHELX Weight | 26.79          |       |        |

---

0 **ALERT level A** = Most likely a serious problem - resolve or explain  
 1 **ALERT level B** = A potentially serious problem, consider carefully  
 13 **ALERT level C** = Check. Ensure it is not caused by an omission or oversight  
 50 **ALERT level G** = General information/check it is not something unexpected

2 ALERT type 1 CIF construction/syntax error, inconsistent or missing data  
 19 ALERT type 2 Indicator that the structure model may be wrong or deficient  
 17 ALERT type 3 Indicator that the structure quality may be low  
 23 ALERT type 4 Improvement, methodology, query or suggestion  
 3 ALERT type 5 Informative message, check

---

It is advisable to attempt to resolve as many as possible of the alerts in all categories. Often the minor alerts point to easily fixed oversights, errors and omissions in your CIF or refinement strategy, so attention to these fine details can be worthwhile. In order to resolve some of the more serious problems it may be necessary to carry out additional measurements or structure refinements. However, the purpose of your study may justify the reported deviations and the more serious of these should normally be commented upon in the discussion or experimental section of a paper or in the "special\_details" fields of the CIF. checkCIF was carefully designed to identify outliers and unusual parameters, but every test has its limitations and alerts that are not important in a particular case may appear. Conversely, the absence of alerts does not guarantee there are no aspects of the results needing attention. It is up to the individual to critically assess their own results and, if necessary, seek expert advice.

### **Publication of your CIF in IUCr journals**

A basic structural check has been run on your CIF. These basic checks will be run on all CIFs submitted for publication in IUCr journals (*Acta Crystallographica*, *Journal of Applied Crystallography*, *Journal of Synchrotron Radiation*); however, if you intend to submit to *Acta Crystallographica Section C* or *E* or *IUCrData*, you should make sure that full publication checks are run on the final version of your CIF prior to submission.

### **Publication of your CIF in other journals**

Please refer to the *Notes for Authors* of the relevant journal for any special instructions relating to CIF submission.

---

**PLATON version of 06/01/2024; check.def file version of 05/01/2024**
